# Supplementary material
Source: PubMed Central journal article supplement (PMC5753304)
Supplement: CJN.02730317SupplementaryData.pdf [file CJN.02730317SupplementaryData.pdf]

**CDC Dialysis Collaborative** Facility Name: \_\_\_\_\_ Date: \_\_\_\_\_ Start time: \_\_\_\_\_ AM / PM  
 Day: M W F Tu Th Sa Shift: 1<sup>st</sup> 2<sup>nd</sup> 3<sup>rd</sup> 4<sup>th</sup> Observer: \_\_\_\_\_ Location within unit: \_\_\_\_\_

**Audit Tool: Catheter connection and disconnection observations**  
 (Use a "✓" if action performed correctly, a "Φ" if not performed. If not observed, leave blank)

| Procedure observed, C=connect, D=disconnect | Discipline | Mask worn properly (if required) | Hand hygiene performed | New clean gloves worn | Catheter removed from blood line aseptically (disconnection only) | Catheter hub scrubbed | Hub antiseptic allowed to dry | Catheter connected to blood lines aseptically (connection only) | New caps attached aseptically (after disconnecting) | Gloves removed | Hand hygiene performed |
|---------------------------------------------|------------|----------------------------------|------------------------|-----------------------|-------------------------------------------------------------------|-----------------------|-------------------------------|-----------------------------------------------------------------|-----------------------------------------------------|----------------|------------------------|
|                                             |            |                                  |                        |                       |                                                                   |                       |                               |                                                                 |                                                     |                |                        |
|                                             |            |                                  |                        |                       |                                                                   |                       |                               |                                                                 |                                                     |                |                        |
|                                             |            |                                  |                        |                       |                                                                   |                       |                               |                                                                 |                                                     |                |                        |
|                                             |            |                                  |                        |                       |                                                                   |                       |                               |                                                                 |                                                     |                |                        |
|                                             |            |                                  |                        |                       |                                                                   |                       |                               |                                                                 |                                                     |                |                        |
|                                             |            |                                  |                        |                       |                                                                   |                       |                               |                                                                 |                                                     |                |                        |
|                                             |            |                                  |                        |                       |                                                                   |                       |                               |                                                                 |                                                     |                |                        |
|                                             |            |                                  |                        |                       |                                                                   |                       |                               |                                                                 |                                                     |                |                        |
|                                             |            |                                  |                        |                       |                                                                   |                       |                               |                                                                 |                                                     |                |                        |
|                                             |            |                                  |                        |                       |                                                                   |                       |                               |                                                                 |                                                     |                |                        |

Discipline: P=physician, N=nurse, T=technician, S=student, O=other  
 Duration of observation period = \_\_\_\_\_ minutes      Number of procedures performed correctly = \_\_\_\_\_  
 Total number of procedures observed during audit = \_\_\_\_\_

**ADDITIONAL COMMENTS/OBSERVATIONS:**



National Center for Emerging and Zoonotic Infectious Diseases  
 Division of Healthcare Quality Promotion



### Checklist: Hemodialysis catheter connection

- Wear mask (if required)
- Perform hand hygiene
- Put on new, clean gloves
- Clamp the catheter and remove caps
- Scrub catheter hub with antiseptic
- Allow hub antiseptic to dry
- Connect catheter to blood lines aseptically
- Remove gloves
- Perform hand hygiene




Centers for Disease Control and Prevention  
 National Center for Emerging and Zoonotic Infectious Diseases
